waves observed during deep sodium thiopental anesthesia may support the hypothesis of synchronization of neuronal activity during anesthesia.<sup>20</sup> However, the mechanism by which the synchronization of the positive sharp cortical waves with MRF unit firings became unmasked during the deep stage of sodium thiopental anesthesia was not elucidated in the present study.

The authors appreciate the criticism of this study of Professor K. Iwama. The authors also thank Dr. J. M. Messick, Jr., for assistance in preparation of the manuscript.

### References

1. Moruzzi G, Magoun HW: Brain stem reticular formation and activation of the EEG. *Electroenceph Clin Neurophysiol* 1:455-473, 1949
2. French JC, Verzeano M, Magoun HW: A neuronal basis of the anesthetic state. *AMA Arch Neurol Psychiat* 69:519-529, 1953
3. Arduini A, Arduini MG: Effect of drugs and metabolic alterations on brain stem arousal mechanism. *J Pharmacol Exp Ther* 110: 76-85, 1954
4. Forbes A, Morison BR: Cortical response to sensory stimulation under deep barbiturate narcosis. *J Neurophysiol* 2:112-128, 1939
5. Huttenlocher PR: Evoked and spontaneous activity in single units of medial brain stem during natural sleep and waking. *J Neurophysiol* 24:451-468, 1961
6. Amassian VE, Macy J, Waller HJ: Patterns of activity of simultaneously recorded neurons in midbrain reticular formation. *Ann NY Acad Sci* 89:883-895, 1961
7. Hubel DJ: Tungsten microelectrode for recording from single units. *Science* 125: 549-550, 1957
8. Green JD: A simple microelectrode for recording from the central nervous system. *Nature* 182:962, 1958
9. Baust W, Niemczyk H: Studies on the adrenaline-sensitive component of the mesencephalic reticular formation. *J Neurophysiol* 26:692-704, 1963
10. Eccles JC, Schmidt R, Willis WD: Pharmacological studies on presynaptic inhibition. *J Physiol* 168:500-530, 1963
11. Somjen GG, Gill M: The mechanism of the blockade of synaptic transmission in the mammalian spinal cord by diethyl ether and by thiopental. *J Pharmacol Exp Ther* 140: 19-30, 1963
12. Somjen GG: Effects of ether and thiopental on spinal presynaptic terminals. *J Pharmacol Exp Ther* 140:396-402, 1963
13. L  nying Y, Oshima T, Yokota T: Site of action of thiamylal sodium on the monosynaptic spinal reflex pathway in cats. *J Neurophysiol* 27:408-428, 1964
14. Miyahara JT, Esplin DW, Zabolocka B: Differential effects of depressant drugs on presynaptic inhibition. *J Pharmacol Exp Ther* 154:118-127, 1966
15. de Jong RH, Robles R, Heavner JE: Suppression of impulse transmission in the cat's dorsal horn by inhalation anesthetics. *ANESTHESIOLOGY* 32:440-445, 1970
16. Rosenberg P, Bartels E: Drug effects on the spontaneous electrical activity of the squid giant axon. *J Pharmacol Exp Ther* 155: 532-544, 1967
17. King EE: Differential action of anesthetics and interneuron depressants upon EEG arousal and recruiting responses. *J Pharmacol Exp Ther* 116:404-417, 1956
18. Galindo A: Effects of procaine, pentobarbital and halothane on synaptic transmission in the central nervous system. *J Pharmacol Exp Ther* 169:185-195, 1969
19. Shimoji K, Bickford RG: Firing patterns of mesencephalic reticular neurons related to a variety of anesthetic agents (abstract). *Fed Proc* 26:763, 1967
20. Faulconer A, Bickford RG: Electroencephalography in Anesthesiology. Springfield, Charles C Thomas, 1960, pp 12-18

### Drugs

**DEATH FROM ASPIRIN** A 23-year-old woman died following the ingestion of aspirin. Since large amounts of aspirin tablets in the gut seem to retard their own absorption, it is essential that serial salicylate determinations be obtained following the ingestion to make certain that continued increases in serum salicylate levels do not occur. Serum salicylate concentrations did not correlate with the state of consciousness or the magnitude of metabolic disturbance. The usefulness of gastric lavage in removing undissolved tablets is questioned. (Ferguson, R. K., and Boutros, A. R.: *Death Following Self-poisoning with Aspirin*, *J.A.M.A.* 213: 1186 (Aug.) 1970.)
